# Supplementary material for: Supramolecular optimization of the visual contrast for colorimetric indicator assays that release resorufin dye
Source: Royal Society of Chemistry journal article supplement (doi:10.1039/d0cc03551c), 2020-01-01
Supplement: d0cc03551c1.pdf [file d0cc03551c1.pdf]

*Electronic Supplementary Information*

**Supramolecular optimization of the visual contrast in a colorimetric chemosensing assay  
that releases resorufin dye**

Janeala J. Morsby, Madushani Dharmarwardana, Hannah McGarraugh, and Bradley D. Smith \*

Department of Chemistry and Biochemistry, 251 Nieuwland Science Hall, University of Notre  
Dame, Notre Dame, United States.

\*Email: [smith.115@nd.edu](mailto:smith.115@nd.edu)

## Materials and Instrumentation

All the solvents and chemicals were purchased from Sigma-Aldrich, Alfa-Aesar, or VWR international and used without further purification unless otherwise stated.  $^1\text{H}$  and  $^{13}\text{C}$  spectra were recorded on Bruker AVANCE III HD 400, 500 MHz spectrometers. Mass spectrometry (MS) was performed using a Bruker microTOF II spectrometer. Synthesized compounds were purified using Biotage flash purification system with SNAP Ultra flash chromatography cartridges.

## N-acetyl- $\beta$ -D-glucosaminidase (NAG) Stock Solution

A 0.9 mg/mL solution of NAG enzyme (Sigma-Aldrich) from bovine kidney was prepared in 1 M PBS Buffer + 0.1 M BSA and the vendor's guarantee of enzymatic activity was confirmed using the standard chromogenic substrate p-nitrophenyl-N-acetyl- $\beta$ -D-glucosaminide.

## HOCl/ OCl<sup>-</sup> Stock Solution

Hypochlorite stock solution was prepared using a previously reported method.<sup>1</sup> To a 1500  $\mu\text{L}$  solution of 154 mM NaCl, 250  $\mu\text{L}$  of 10-14% w/w NaOCl was added followed by dropwise addition of 6M HCl to obtain a pH range of 3.92. The concentration of active total chlorine species in solution expressed as  $[\text{HOCl}]_{\text{T}}$  (where  $[\text{HOCl}]_{\text{T}} = [\text{HOCl}] + [\text{Cl}_2] + [\text{Cl}_3^-] + [\text{OCl}^-]$ ) in HPLC Grade water was determined by converting all the active chlorine species to  $\text{OCl}^-$  with 0.1 M NaOH and measuring the concentration of  $\text{OCl}^-$ . The concentration of  $\text{OCl}^-$  was determined spectrophotometrically at 292 nm ( $\epsilon = 362 \text{ M}^{-1} \text{ cm}^{-1}$ ) with a UV-visible spectrophotometer. Calculation:  $A = \epsilon cl$ ; where  $l = 1 \text{ cm}$ ,  $A = 0.6359$ ,  $\epsilon = 362 \text{ M}^{-1} \text{ cm}^{-1}$ . Thus,  $c = 1.76 \text{ mM HOCl/ OCl}^-$

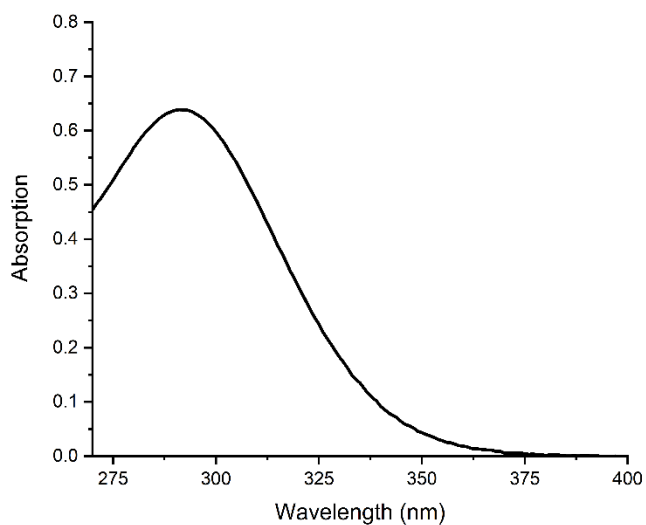

Figure S1: Absorption spectrum of HOCl/ OCl<sup>-</sup> for stock solution concentration determination.

## Synthesis

The chemosensor **RT-1** and enzyme substrate **NHPO** were synthesized as previously described,<sup>2,3</sup> and the following <sup>1</sup>H NMR and HR-MS data demonstrate high purity. Tetralactam macrocycles **M1** and **M2** were synthesized as part of previous studies<sup>4,5</sup> and the purity was confirmed by <sup>1</sup>H NMR.

**RF-TBA:** Resorufin sodium salt (50 mmol, 10.6 mg) and 40 % wt tetrabutylammonium hydroxide solution (50 mmol, 33  $\mu$ L) were dissolved in 50 mL of PBS. The resulting mixture was extracted with chloroform (3  $\times$  50 mL). The combined chloroform layers were dried under vacuum to obtain pure **RF.TBA** as a dark pink solid.

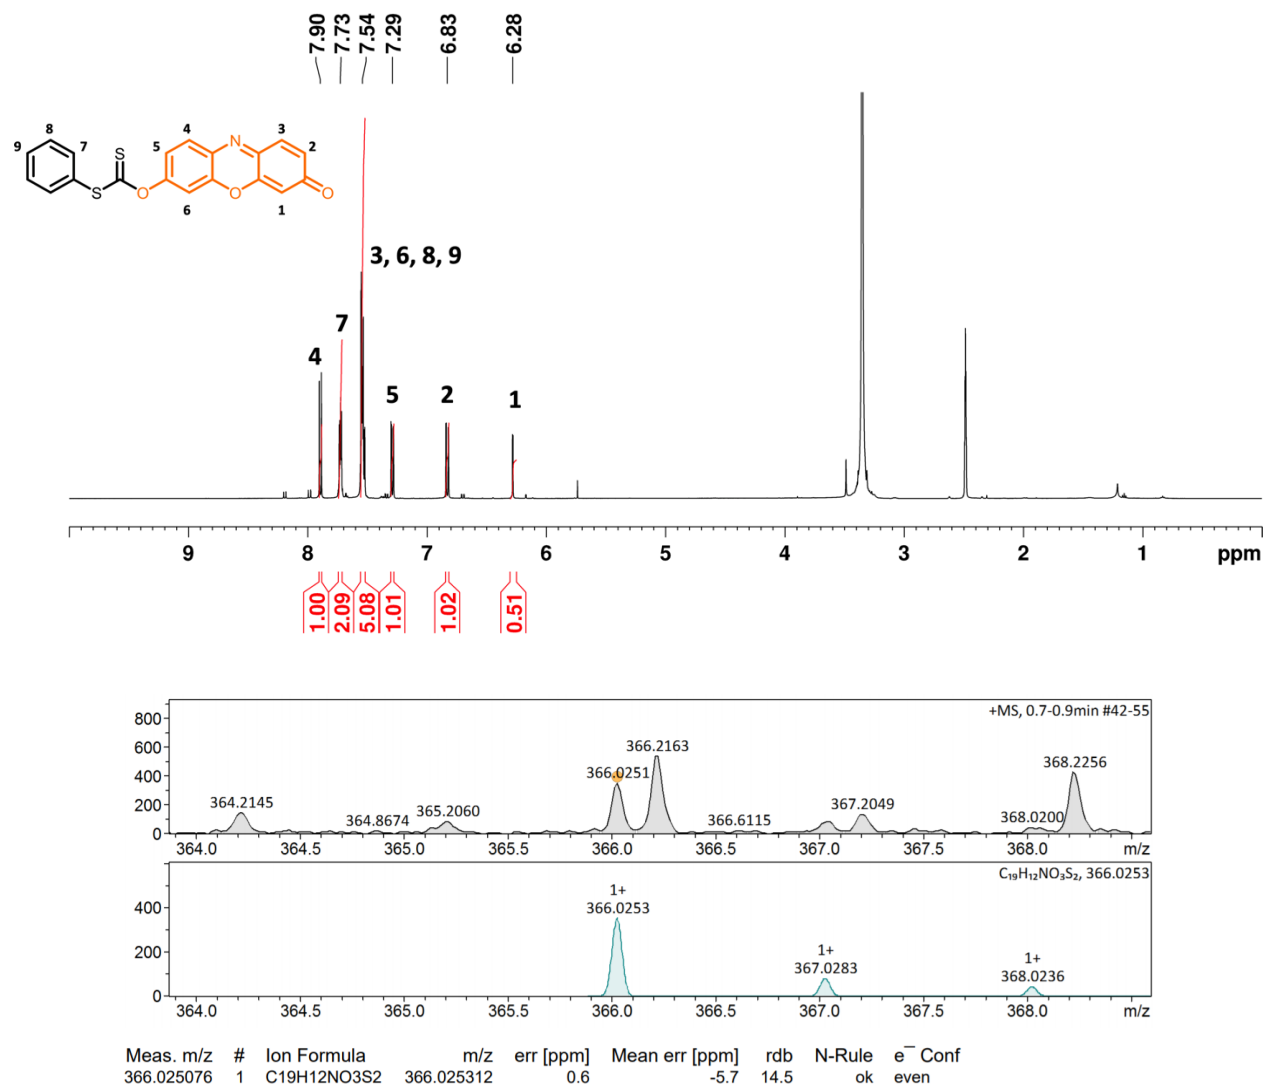

Figure S2. <sup>1</sup>H NMR (500 MHz; DMSO-d<sub>6</sub>; Me<sub>4</sub>Si) and HR-ESI mass spectrum of **RT-1**.

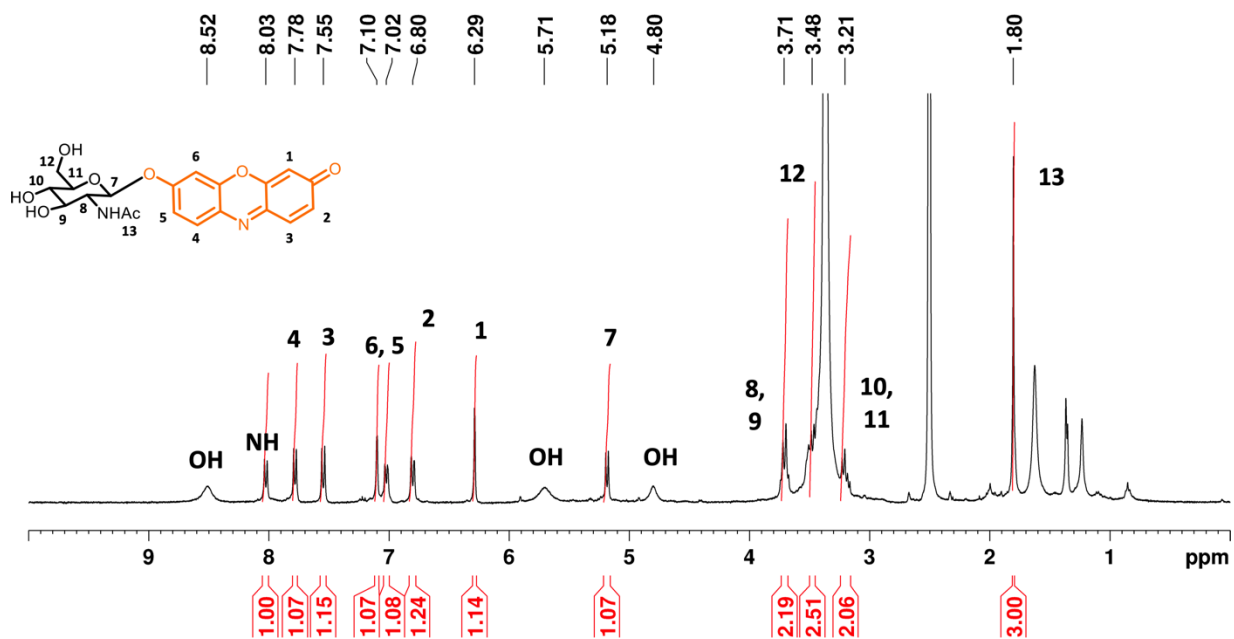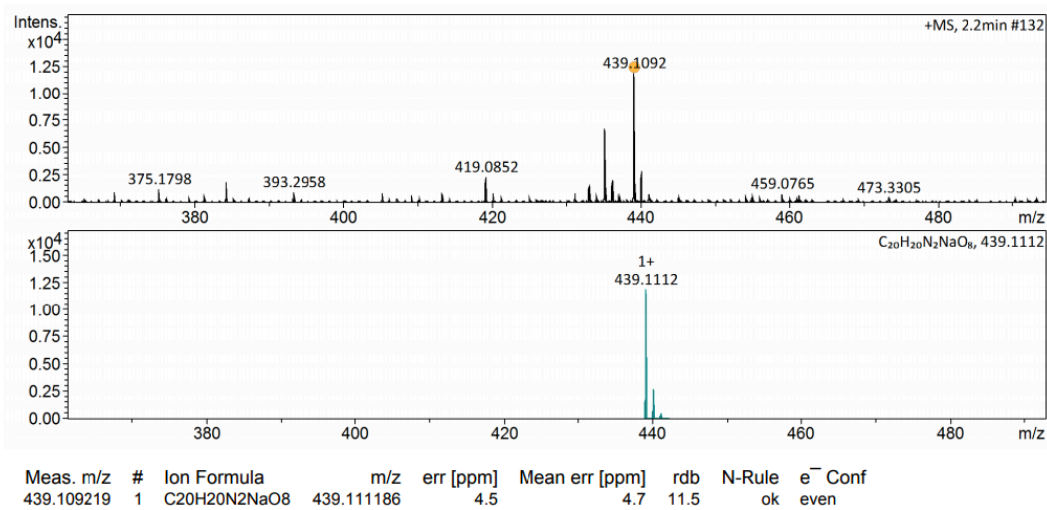

Figure S3. <sup>1</sup>H NMR (400 MHz; DMSO-d<sub>6</sub>; Me<sub>4</sub>Si) and HR-ESI mass spectrum of NHPO. The broad OH peaks in the <sup>1</sup>H NMR spectrum are due to exchange promoted by adventitious water in the DMSO-d<sub>6</sub>.

## <sup>1</sup>H NMR Titration Data

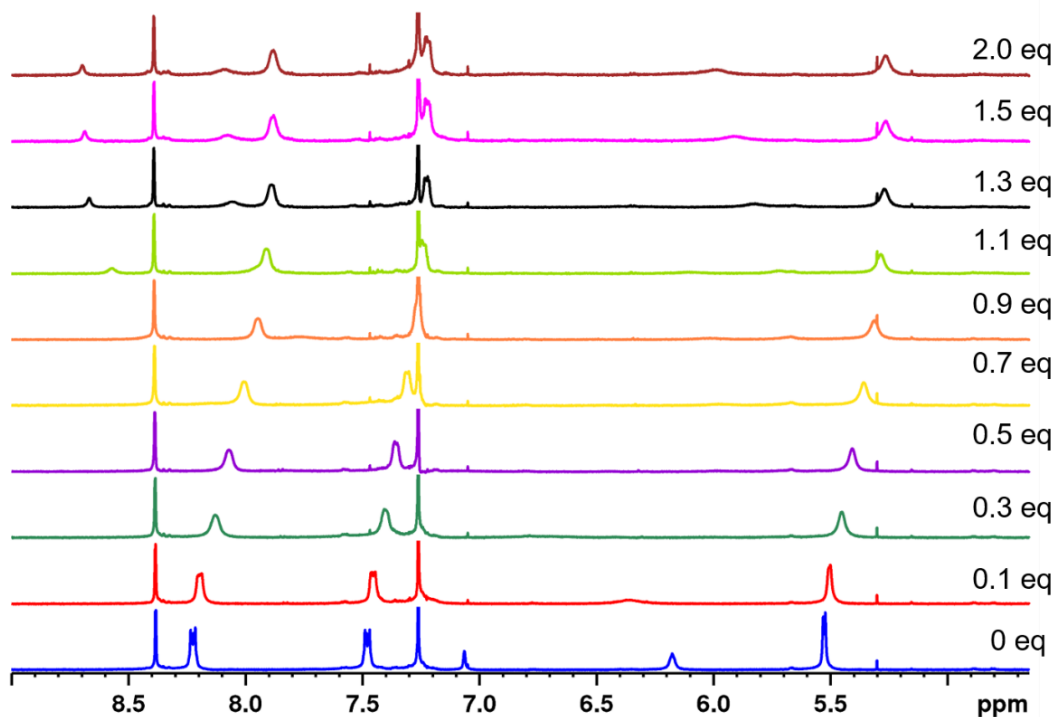

Figure S4. <sup>1</sup>H NMR titration (500 MHz, CDCl<sub>3</sub>, 25° C) that added aliquots from a stock solution containing 10 mM **RF** (tetrabutylammonium salt)/ 0.5 mM **M1** to a solution of **M1** (0.5 mM).

## *K<sub>a</sub>* Determination by Fluorescence Titration

Previously described titration method was employed.<sup>6</sup> Stock solutions of the guest, **RF** (1 mM) and host, **M2** (1 mM) were made in pure water. A solution of the guest was placed in a cuvette (10 μM) and aliquots of the host (**M2**) were added fluorescence spectra were acquired (ex: 540 nm, em: 585 nm). The data was plotted and association constant for **RF** binding to **M2** was determined by non-linear squares fitting of the titration points to a model for 1:1 binding within the Origin software.<sup>7</sup>

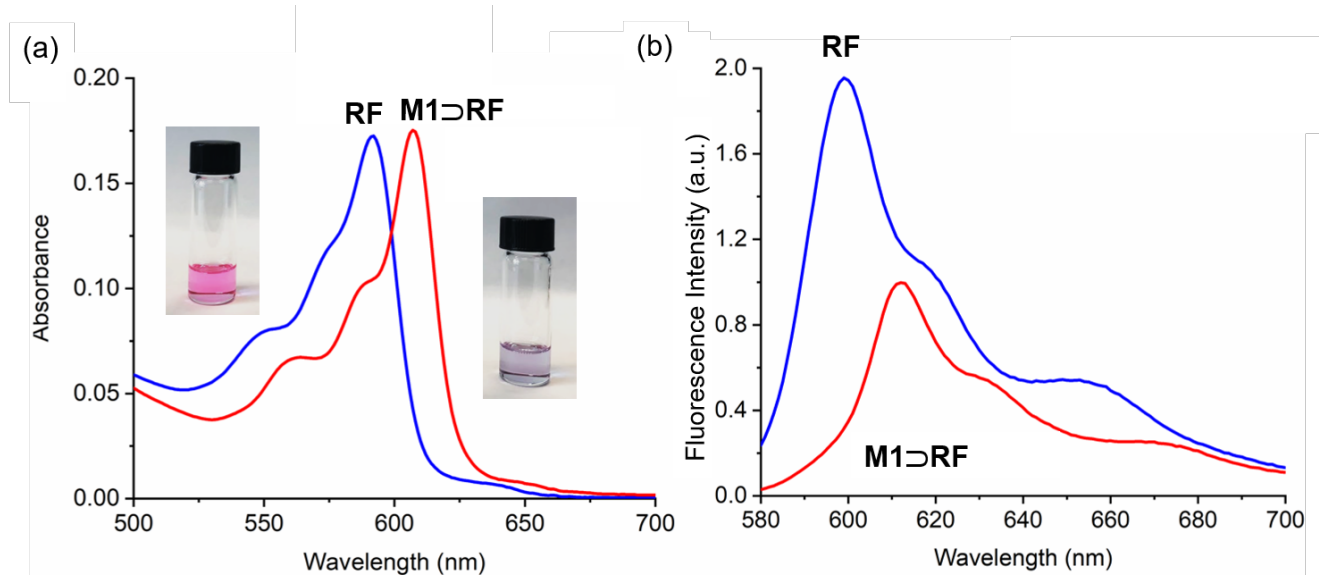

Figure S5. (a) Absorption (b) fluorescence emission of 10  $\mu\text{M}$  RF (tetrabutylammonium salt) and M1D RF in chloroform at 25°C.

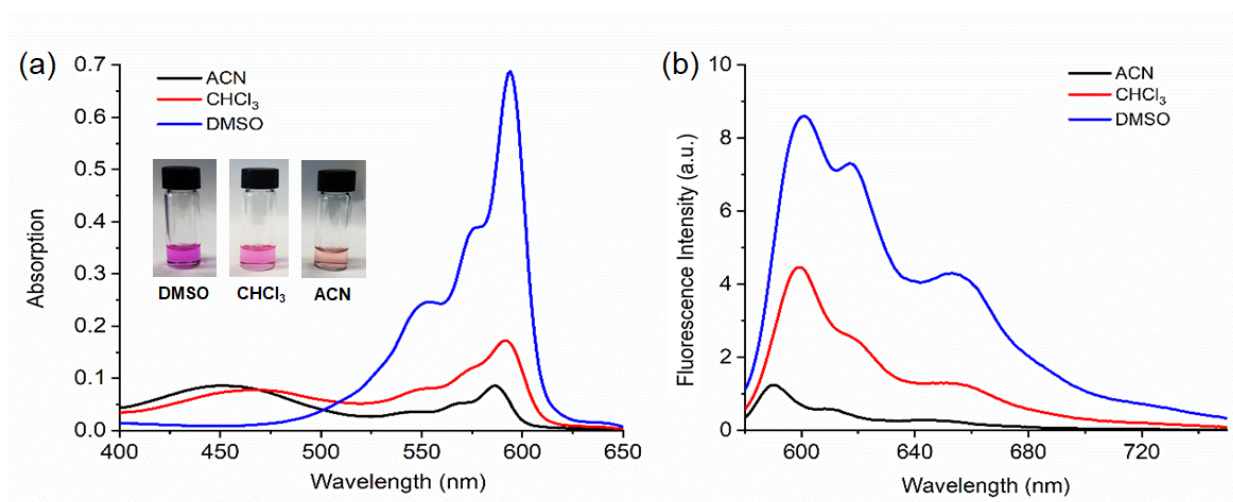

Figure S6. Absorption and emission spectra of 10  $\mu\text{M}$  RF (tetrabutylammonium salt) in different organic solvents at 25°C, along with photographs of the solutions.

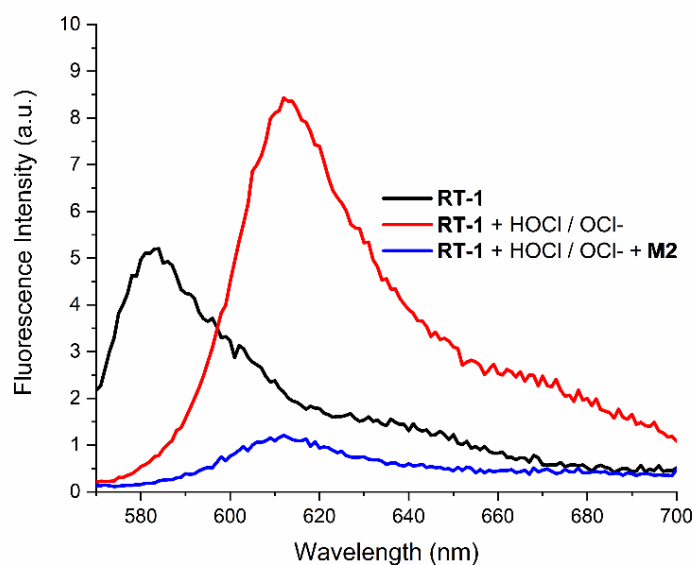

Figure S7. Fluorescence spectra ( $\lambda_{\text{ex}} = 550 \text{ nm}$ ) of a sample, initially containing **RT-1** ( $50 \mu\text{M}$ , black line), and 3 minutes after addition of HOCl/OCl<sup>-</sup> ( $5 \mu\text{M}$ , red line), or 3 minutes after a two-step addition sequence of HOCl/OCl<sup>-</sup> ( $5 \mu\text{M}$ ) and then **M2** ( $500 \mu\text{M}$ ) (blue line). In 200 mM PBS, pH 7.4 at 25°C.

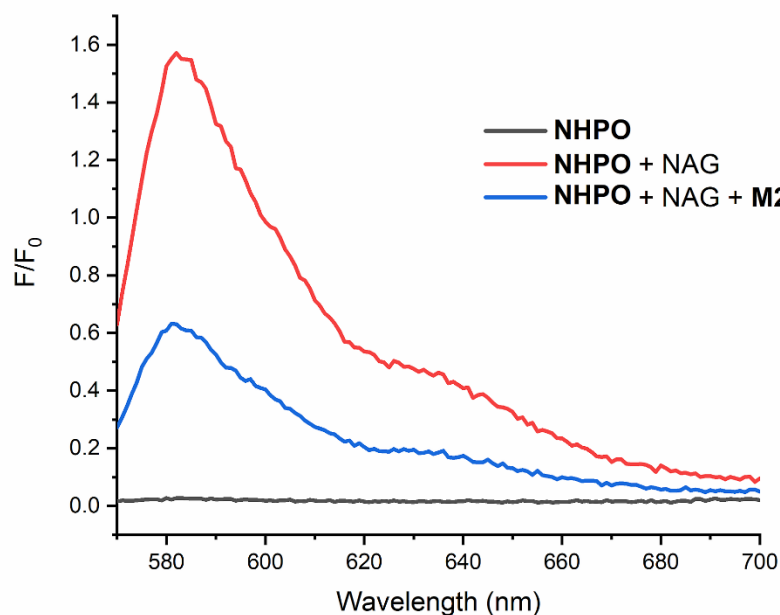

Figure S8. Fluorescence spectra ( $\lambda_{\text{ex}} = 550 \text{ nm}$ ) of a sample initially containing **NHPO** ( $50 \mu\text{M}$ , black line), 30 minutes after addition of  $0.9 \mu\text{g/mL}$  NAG (red line), or 45 minutes after a two-step addition sequence of  $0.9 \mu\text{g/mL}$  NAG and then **M2** ( $500 \mu\text{M}$ ) (blue line). In 100 mM PBS + 100  $\mu\text{M}$  BSA, pH 7.4 at 25°C.

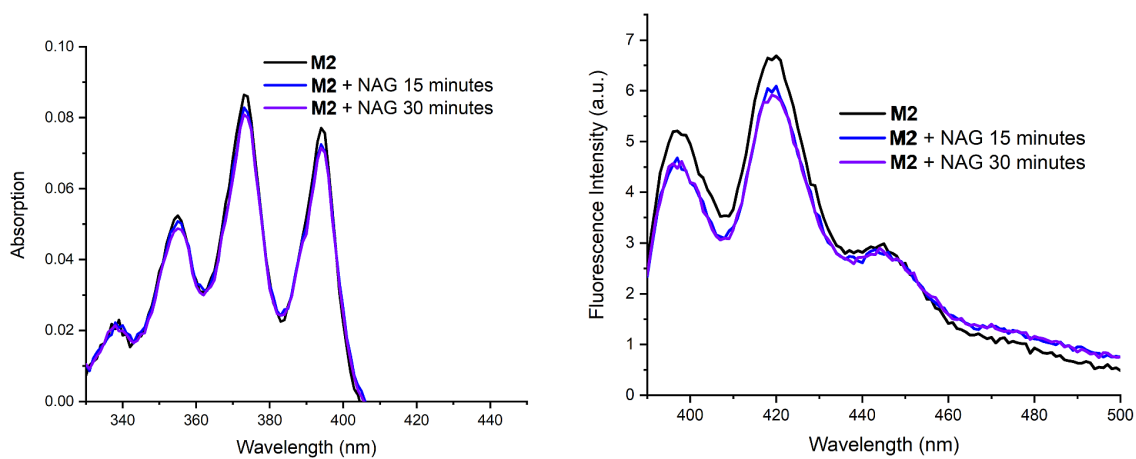

Figure S9. Absorption and fluorescence emission (ex: 370 nm, em: 390 nm) of a solution containing 15  $\mu\text{M}$  **M2** in the presence and absence of (0.1  $\mu\text{g}/\text{mL}$  NAG enzyme plus  $\sim 10$   $\mu\text{M}$  BSA), in water and 25°C. The very small intensity decrease upon protein addition is due to sample dilution, and it appears there is negligible interaction of NAG or BSA with **M2**.



## Molecular Modeling

The semiempirical PM7 method was employed within the MOPAC program. (J. J. P. Stewart, MOPAC; Stewart Computational Chemistry: Colorado Springs, CO, 2008.) The dielectric constant of the solvent was set at 78.4 for water and 25 °C. Solubilizing groups are shortened to hydrogens.

### Cartesian Coordinates at the PM7 Level

TOTAL ENERGY = -10938.84941 EV

FINAL GEOMETRY OBTAINED

EPS=78.4 PM7 CHARGE=-1 EF xyz GNORM=0.100 SHIFT=80

|   |             |    |             |    |             |    |
|---|-------------|----|-------------|----|-------------|----|
| C | 3.81380829  | +1 | 1.30462607  | +1 | 2.77072192  | +1 |
| C | 4.46630897  | +1 | 1.72282102  | +1 | 3.97923758  | +1 |
| C | 3.85445875  | +1 | -0.07469538 | +1 | 2.41744974  | +1 |
| C | 4.52278289  | +1 | -0.98838362 | +1 | 3.30059312  | +1 |
| C | 5.10257652  | +1 | 0.82824274  | +1 | 4.78463703  | +1 |
| C | 5.12626829  | +1 | -0.55492481 | +1 | 4.44154131  | +1 |
| C | 9.41399981  | +1 | 3.11447739  | +1 | -2.24281169 | +1 |
| C | 10.04647500 | +1 | 3.20811044  | +1 | -0.99419112 | +1 |
| C | 9.29500666  | +1 | 1.84768291  | +1 | -2.88538464 | +1 |
| C | 9.85732272  | +1 | 0.71176655  | +1 | -2.28633684 | +1 |
| C | 10.54072507 | +1 | 2.05956950  | +1 | -0.36123024 | +1 |
| C | 10.48068323 | +1 | 0.80420943  | +1 | -1.03341507 | +1 |
| C | 11.07067419 | +1 | -0.34128367 | +1 | -0.39753859 | +1 |
| C | 11.11361398 | +1 | 2.10070945  | +1 | 0.95557584  | +1 |
| C | 11.63809947 | +1 | 0.98753886  | +1 | 1.53732985  | +1 |
| C | 11.63203900 | +1 | -0.25491023 | +1 | 0.83943026  | +1 |
| C | 8.60147273  | +1 | 1.78196920  | +1 | -4.14153263 | +1 |
| C | 8.08799392  | +1 | 2.89726345  | +1 | -4.72912531 | +1 |
| C | 8.23196843  | +1 | 4.16783564  | +1 | -4.10018097 | +1 |
| C | 8.87252893  | +1 | 4.26962074  | +1 | -2.90343033 | +1 |
| C | 3.25327707  | +1 | -0.50384341 | +1 | 1.22532922  | +1 |
| C | 2.69733434  | +1 | 0.42381134  | +1 | 0.33341905  | +1 |
| C | 2.64242909  | +1 | 1.80101397  | +1 | 0.69491638  | +1 |
| C | 3.15193730  | +1 | 2.21368170  | +1 | 1.93383405  | +1 |
| C | 2.18031863  | +1 | 0.03179460  | +1 | -0.94739029 | +1 |
| C | 1.64134407  | +1 | 0.94355754  | +1 | -1.80277847 | +1 |
| C | 1.58561273  | +1 | 2.32119784  | +1 | -1.44026884 | +1 |
| C | 2.07068204  | +1 | 2.73223286  | +1 | -0.23651708 | +1 |
| C | 2.97568267  | +1 | 3.64315633  | +1 | 2.37838983  | +1 |
| N | 4.10172557  | +1 | 4.45187396  | +1 | 1.88602183  | +1 |
| C | 3.98824233  | +1 | 5.80990099  | +1 | 1.87460416  | +1 |
| O | 2.96967542  | +1 | 6.34369128  | +1 | 2.30922113  | +1 |
| C | 5.10337542  | +1 | 6.62404164  | +1 | 1.32444276  | +1 |
| C | 6.38485448  | +1 | 6.10926719  | +1 | 1.12902971  | +1 |
| C | 7.36039780  | +1 | 6.90974041  | +1 | 0.53609494  | +1 |
| C | 7.07784819  | +1 | 8.24076581  | +1 | 0.21022773  | +1 |
| C | 5.81018581  | +1 | 8.76272941  | +1 | 0.45002614  | +1 |
| C | 4.81776714  | +1 | 7.95278454  | +1 | 0.99423942  | +1 |

|   |             |    |             |    |             |    |
|---|-------------|----|-------------|----|-------------|----|
| C | 8.71547027  | +1 | 6.40633728  | +1 | 0.19078891  | +1 |
| O | 9.62541231  | +1 | 7.18453767  | +1 | -0.08450807 | +1 |
| N | 8.94079512  | +1 | 5.05990192  | +1 | 0.15666159  | +1 |
| C | 10.22853927 | +1 | 4.56094241  | +1 | -0.35167652 | +1 |
| C | 9.81440175  | +1 | -0.62152972 | +1 | -2.98973330 | +1 |
| N | 8.86679137  | +1 | -1.51732854 | +1 | -2.30813718 | +1 |
| C | 8.83586574  | +1 | -2.83672581 | +1 | -2.63377849 | +1 |
| C | 7.92036886  | +1 | -3.72709992 | +1 | -1.87215821 | +1 |
| C | 6.70340644  | +1 | -3.27154521 | +1 | -1.36823457 | +1 |
| C | 5.89690175  | +1 | -4.14725979 | +1 | -0.64300816 | +1 |
| C | 6.28730303  | +1 | -5.47429457 | +1 | -0.44640047 | +1 |
| C | 7.49606565  | +1 | -5.92644182 | +1 | -0.96994227 | +1 |
| C | 8.31574334  | +1 | -5.05362756 | +1 | -1.68115676 | +1 |
| C | 3.19119740  | +1 | -1.97800281 | +1 | 0.91807835  | +1 |
| N | 4.45861722  | +1 | -2.41980201 | +1 | 0.31691706  | +1 |
| C | 4.59556303  | +1 | -3.71530687 | +1 | -0.06988925 | +1 |
| O | 3.66530444  | +1 | -4.51044116 | +1 | 0.07215575  | +1 |
| O | 9.56540770  | +1 | -3.27990411 | +1 | -3.51908982 | +1 |
| C | 6.08430783  | +1 | 0.95544590  | +1 | -1.20747864 | +1 |
| N | 6.66002226  | +1 | 0.04065272  | +1 | -0.42496370 | +1 |
| C | 6.00918089  | +1 | 2.34672912  | +1 | -0.83380284 | +1 |
| O | 6.53805765  | +1 | 2.75599878  | +1 | 0.37023477  | +1 |
| C | 7.18921373  | +1 | 0.44149613  | +1 | 0.73424741  | +1 |
| C | 7.14156687  | +1 | 1.81290239  | +1 | 1.16304041  | +1 |
| C | 7.67159566  | +1 | 2.26693632  | +1 | 2.33190105  | +1 |
| C | 7.84407762  | +1 | -0.50023230 | +1 | 1.60726775  | +1 |
| C | 8.38501465  | +1 | -0.09210632 | +1 | 2.77501733  | +1 |
| C | 8.32636327  | +1 | 1.31144390  | +1 | 3.19984307  | +1 |
| C | 5.51597253  | +1 | 0.58717751  | +1 | -2.47873205 | +1 |
| C | 4.94527984  | +1 | 1.51739875  | +1 | -3.27221356 | +1 |
| C | 4.87300455  | +1 | 2.92795791  | +1 | -2.87563148 | +1 |
| C | 5.44012539  | +1 | 3.31441643  | +1 | -1.59684750 | +1 |
| O | 4.34109097  | +1 | 3.75401182  | +1 | -3.61738014 | +1 |
| O | 8.82536173  | +1 | 1.65456233  | +1 | 4.27007678  | +1 |
| H | 4.46014140  | +1 | 2.78371788  | +1 | 4.23936159  | +1 |
| H | 4.55184649  | +1 | -2.04663149 | +1 | 3.03732730  | +1 |
| H | 5.61015438  | +1 | 1.14825144  | +1 | 5.69459216  | +1 |
| H | 5.64279222  | +1 | -1.24860737 | +1 | 5.10493309  | +1 |
| H | 11.06509406 | +1 | -1.29519247 | +1 | -0.92472535 | +1 |
| H | 11.10797265 | +1 | 3.04860425  | +1 | 1.49986932  | +1 |
| H | 12.06288670 | +1 | 1.02023999  | +1 | 2.54033571  | +1 |
| H | 12.07757238 | +1 | -1.12666835 | +1 | 1.31866048  | +1 |
| H | 8.48078401  | +1 | 0.80821591  | +1 | -4.62198552 | +1 |
| H | 7.55675086  | +1 | 2.84170275  | +1 | -5.67916012 | +1 |
| H | 7.81422108  | +1 | 5.04548630  | +1 | -4.59408984 | +1 |
| H | 8.97856143  | +1 | 5.24510619  | +1 | -2.42709583 | +1 |
| H | 2.23997220  | +1 | -1.01948292 | +1 | -1.23589298 | +1 |
| H | 1.25520253  | +1 | 0.64476097  | +1 | -2.77698197 | +1 |
| H | 1.16035048  | +1 | 3.03050105  | +1 | -2.15043929 | +1 |
| H | 2.04594398  | +1 | 3.79118971  | +1 | 0.02934829  | +1 |
| H | 2.90765132  | +1 | 3.72837743  | +1 | 3.49225535  | +1 |
| H | 2.00585196  | +1 | 4.06961559  | +1 | 2.01658031  | +1 |

|   |             |    |             |    |             |    |
|---|-------------|----|-------------|----|-------------|----|
| H | 4.88030841  | +1 | 3.94571460  | +1 | 1.48305548  | +1 |
| H | 6.62622777  | +1 | 5.09489682  | +1 | 1.45217784  | +1 |
| H | 7.85352421  | +1 | 8.87211527  | +1 | -0.23473706 | +1 |
| H | 5.59220871  | +1 | 9.80464951  | +1 | 0.20547888  | +1 |
| H | 3.81447609  | +1 | 8.35585677  | +1 | 1.16485293  | +1 |
| H | 8.22454506  | +1 | 4.36372020  | +1 | 0.32136289  | +1 |
| H | 10.96703491 | +1 | 4.54264697  | +1 | 0.48862585  | +1 |
| H | 10.66878882 | +1 | 5.28384485  | +1 | -1.08673499 | +1 |
| H | 10.83345957 | +1 | -1.08709250 | +1 | -3.01392265 | +1 |
| H | 9.52843975  | +1 | -0.53460490 | +1 | -4.06752197 | +1 |
| H | 8.27262727  | +1 | -1.10292388 | +1 | -1.59182849 | +1 |
| H | 6.38000558  | +1 | -2.24100260 | +1 | -1.54902425 | +1 |
| H | 5.64420075  | +1 | -6.15715447 | +1 | 0.11590198  | +1 |
| H | 7.80038316  | +1 | -6.96446016 | +1 | -0.82338215 | +1 |
| H | 9.26662705  | +1 | -5.40591135 | +1 | -2.09040512 | +1 |
| H | 2.34140368  | +1 | -2.23234920 | +1 | 0.23727619  | +1 |
| H | 2.98204237  | +1 | -2.57440552 | +1 | 1.84340073  | +1 |
| H | 5.19314717  | +1 | -1.72297880 | +1 | 0.21319645  | +1 |
| H | 7.62270163  | +1 | 3.29617288  | +1 | 2.65361514  | +1 |
| H | 7.88608749  | +1 | -1.54385129 | +1 | 1.28306589  | +1 |
| H | 8.88914855  | +1 | -0.77683924 | +1 | 3.44729399  | +1 |
| H | 5.56946817  | +1 | -0.46567424 | +1 | -2.77011967 | +1 |
| H | 4.51120938  | +1 | 1.26814086  | +1 | -4.23614250 | +1 |
| H | 5.39113145  | +1 | 4.35269899  | +1 | -1.31209333 | +1 |

**Table S1: Abridged collection of enzyme substrates and chemosensors that release resorufin (RF).**

| Probe                                                        | Analyte                                                                   | Method of Detection          | Reference Number |
|--------------------------------------------------------------|---------------------------------------------------------------------------|------------------------------|------------------|
| <p>Resorufin<br/>Thionocarbonate (RT)</p>                    | Mercury<br>$\text{Hg}^{2+}$                                               | Chromogenic                  | 8                |
| <p>Resorufin <math>\beta</math>-D-<br/>glucuronide (REG)</p> | E. coli                                                                   | Chromogenic                  | 9                |
| <p>Novel Probe 1</p>                                         | Alkaline<br>Phosphatase<br>(ALP)                                          | Fluorescence                 | 10               |
| <p>Resorufin turn on Probe<br/>(RTP-1)</p>                   | Hydrazine<br>( $\text{N}_2\text{H}_4$ )                                   | Fluorescence                 | 11               |
| <p>Resorufin-<math>\beta</math>-D-<br/>Galactopyranoside</p> | Biotinylated<br>DNA                                                       | Fluorescence                 | 12               |
| <p>F-Chemosimeter 1</p>                                      | Fluorine ( $\text{F}^-$ )                                                 | Chromogenic/<br>Fluorescence | 13               |
| <p>Sulfite Selective Probe</p>                               | Sulfite ( $\text{SO}_3^{2-}$ )                                            | Chromogenic/<br>Fluorescence | 14               |
| <p>R1</p>                                                    | Perborate ( $\text{BO}_3^-$ )<br>/Hydrazine<br>( $\text{N}_2\text{H}_4$ ) | Chromogenic/<br>Fluorescence | 15,16            |
| <p>Re-SS</p>                                                 | Polysulfides                                                              | Fluorescence                 | 17               |
| <p>Ozone Probe 1</p>                                         | Ozone ( $\text{O}_3$ )                                                    | Chromogenic/<br>Fluorescence | 18               |
| <p>PC1</p>                                                   | Hydrogen<br>Peroxide ( $\text{H}_2\text{O}_2$ )                           | Fluorescence                 | 19               |

|                                                                                                                     |                                                                                            |                               |    |
|---------------------------------------------------------------------------------------------------------------------|--------------------------------------------------------------------------------------------|-------------------------------|----|
| 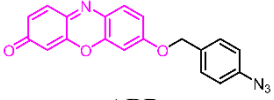 <p>ABR</p>                        | Hydrogen Sulfide (H <sub>2</sub> S)                                                        | Fluorescence                  | 20 |
|  <p>Mercury Probe 1</p>            | Mercury (Hg <sup>2+</sup> )                                                                | Chromogenic/Fluorescence      | 21 |
|  <p>RC</p>                         | Hydrogen sulfide (H <sub>2</sub> S), Cysteine (Cys), Homocysteine (Hcy), Glutathione (GSH) | Fluorescence                  | 22 |
|  <p>Probe 1</p>                    | Acetylcholinesterase                                                                       | Fluorescence                  | 23 |
|  <p>LISA-101</p>                  | $\gamma$ -glutamyl cyclotransferase                                                        | Fluorescence                  | 24 |
|  <p>Probe 3</p>                  | Epoxy-hydrolase                                                                            | Fluorescence                  | 25 |
|  <p>Resorufin Sulfatase (RS)</p> | Sulfatase                                                                                  | Fluorescence                  | 26 |
|  <p>Pro-fluoroprobe</p>          | Thrombin protease                                                                          | Fluorescence                  | 27 |
|  <p>Probe 1</p>                  | Glucose                                                                                    | Fluorescence                  | 28 |
|  <p>PR1</p>                      | Reactive Oxygen, Nitrogen (ONOO <sup>-</sup> )                                             | Fluorescence and Colorimetric | 29 |

|                                                                                                        |                                            |                               |    |
|--------------------------------------------------------------------------------------------------------|--------------------------------------------|-------------------------------|----|
| 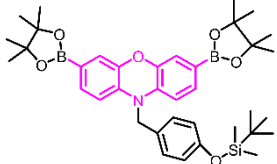 <p>Pinkment-OTBS</p> | (ONOO <sup>-</sup> and F <sup>-</sup> )    | Fluorescence and Colorimetric | 29 |
|  <p>Pinkment-OAC</p>  | Esterase and H <sub>2</sub> O <sub>2</sub> | Fluorescence and Colorimetric | 29 |
|  <p>Probe 1</p>       | Carboxylesterase                           | Fluorescence                  | 30 |
|  <p>NBCD</p>          | H <sub>2</sub> O <sub>2</sub>              | Fluorescence                  | 31 |
|  <p>Res-GlcGcase</p> | β-Glucocerebrosidase                       | Fluorescence                  | 32 |
|  <p>Cys probe</p>   | Cysteine                                   | Fluorescence                  | 33 |
|  <p>AR</p>          | Phosphite and Nickel oxide                 | Fluorescence                  | 34 |

## References:

- (1) M. C. Robson, W. G. Payne, F. Ko, M. Mentis, G. Donati, S. M. Shafii, S. Culverhouse, L. Wang, B. Khosrovi, R. Najafi, et al., *J. Burns Wounds*, 2007, **6**, 80-90.
- (2) M. G. Choi, Y. J. Lee, K. M. Lee, K. Y. Park, T. J. Park and S. Chang, *Analyst*, 2019, **144**, 7263–7269.
- (3) F. Yan, X. Tian, Z. Luan, L. Feng, X. Ma and T. D. James, *Chem. Commun.*, 2019, **55**, 1955–1958.
- (4) J. J. Gassensmith, E. Arunkumar, L. Barr, J. M. Baumes, K. M. Divittorio, J. R. Johnson, B. C. Noll and B. D. Smith, *J. Am. Chem. Soc.*, 2007, **129**, 15054–15059.
- (5) C. F. A. Gómez-Durán, W. Liu, D. Lourdes and B. D. Smith, *J. Org. Chem.*, 2017, **82**, 8334–8341.
- (6) W. Liu, E. M. Peck, K. D. Hendzel and B. D. Smith, *Org. Lett.*, 2015, **17**, 5268–5271.
- (7) E. M. Peck, W. Liu, G. T. Spence, S. K. Shaw, A. P. Davis, H. Destecroix and B. D. Smith, *J. Am. Chem. Soc.*, 2015, **137**, 6–9.
- (8) M. G. Choi, S. Y. Park, K. Y. Park and S. K. Chang, *Sci. Rep.* **2019**, *9*, 1–8.
- (9) G. Magro, R. E. S. Bain, C. A. Woodall, R. L. Matthews, S. W. Gundry and A. P. Davis, *Environ. Sci. Technol.*, 2014, **48**, 9624–9631.
- (10) H. Zhang, C. Xu, J. Liu, X. Li, L. Guo and X. Li, *Chem. Commun.*, 2015, **51**, 7031–7034.
- (11) T. Tang, Y. Q. Chen, B. S. Fu, Z. Y. He, H. Xiao, F. Wu, J. Q. Wang, S. R. Wang and X. Zhou, *Chinese Chem. Lett.*, 2016, **27**, 540–544.
- (12) Z. Li, R. B. Hayman and D. R. Walt, *J. Am. Chem. Soc.*, 2008, **130**, 12622–12623.
- (13) S. Y. Kim and J. I. Hong, *Org. Lett.*, 2007, **9**, 3109–3112.
- (14) M. G. Choi, J. Hwang, S. Eor and S. K. Chang, *Org. Lett.*, 2010, **12**, 5624–5627.
- (15) M. G. Choi, J. O. Moon, J. Bae, J. W. Lee and S. K. Chang, *Org. Biomol. Chem.*, 2013, **11**, 2961–2965.
- (16) M. G. Choi, S. Cha, J. E. Park, H. Lee, H. L. Jeon and S. K. Chang, *Org. Lett.*, 2010, **12**, 1468–1471.
- (17) J. Liu and Z. Yin, *Analyst*, 2019, **144**, 3221–3225.
- (18) Y. Zhang, W. Shi, X. Li and H. Ma, *Sci. Rep.*, 2013, **3**, 2–7.
- (19) E. W. Miller, O. Tulyanthan, E. Y. Isacoff and C. Chang, *J. Nat. Chem. Biol.*, 2007, **3**, 263–267.
- (20) M. Kim, Y. H. Seo, Y. Kim, J. Heo, W. D. Jang, S. J. Sim and S. Kim, *Chem. Commun.*, 2017, **53**, 2275–2278.
- (21) M. S. Thakare and P. M. Yeole, *J. Biol. Chem. Chron.*, 2018, **4**, 48–53.
- (22) H. Zhang, L. Xu, W. Chen, J. Huang, C. Huang, J. Sheng and X. Song, *Anal. Chem.*, 2019, **91**, 1904–1911.
- (23) K. Cui, Z. Chen, Z. Wang, G. Zhang and D. Zhang, *Analyst*, 2011, **136**, 191–195.
- (24) T. Yoshiya, H. Ii, S. Tsuda, S. Kageyama, T. Yoshiki and Y. Nishiuchi, *Org. Biomol. Chem.*, 2015, **13**, 3182–3185.
- (25) M. L. S. O. Lima, M. R. B. Chaves, R. M. C. Do Nascimento, C. C. S. Gonçalves and A. J. J. Marsaioli, *Braz. Chem. Soc.*, 2018, **29**, 1149–1156.
- (26) E. L. Smith, C. R. Bertozzi and K. E. Beatty, *ChemBioChem.*, 2014, **15**, 1101–1105.
- (27) D. Arian, J. Harenberg and R. Krämer, *J. Med. Chem.*, 2016, **59**, 7576–7583.
- (28) X. Gao, X. Li, Q. Wan, Z. Li and H. Ma, *Talanta*, 2014, **120**, 456–461.
- (29) L. Wu, A. C. Sedgwick, X. Sun, S. D. Bull, X. P. He and T. D. James, *Acc. Chem. Res.*, 2019, **52**, 2582–2597.
- (30) Y. Zhang, W. Chen, D. Feng, W. Shi, X. Li, and H. Ma, *Analyst* **2012**, *137*, 716–721.
- (31) Z. Han, X. Liang, X. Ren, L. Shang and Z. Y., *Chem. Asian J.* **2016**, *11*, 818–822.
- (32) M. C. Deen, C. Proceviat, X. Shan, L. Wu, D. L. Shen, G. J. Davies, and D. J. Vocadlo, *ACS Chem. Biol.* **2020**, *12*, 824–829.
- (33) J. Zhang, Y. Miao, Z. Cheng, L. Liang and C. Liu, *Analyst* **2020**, *145*, 1878–1884.
- (34) Y. Chang, M. Liu and J. Liu, *Anal. Chem.* **2020**, *92*, 3118–3124
